# Supplementary material for: Evaluation of two hydrometeorogical ensemble strategies for flash flood forecasting over a catchment of the eastern Pyrenees
Source: Copernicus journal article supplement (doi:10.5194/nhess-2019-232), 2019-09-02
Supplement: Supplementary file [file nhess-2019-232-AC2-supplement.pdf]

We would like to thank the Referee #2 for his evaluation. Please find below the point-by-point replies for the comments of Anonymous Referee # 2 (The reviewer's comments are in italic).

*Comments by Anonymous Referee #2:*

*One general comment is whether it would be possible to reduce the number of figures in the manuscript as 22 is quite a lot. For example in section 5.1 there are 6 figures, but I believe that it is only necessary to retain figures 10 and 11 as these contain the most important information regarding the verification of the SREPS.*

We would prefer to keep these figures in the manuscript as we think they are relevant for a better understanding of the whole study.

*I would also like the authors to be more explicit about why these two particular ensemble strategies were chosen, what differences may be expected from them and why these differences were not observed.*

When forecasting deep moist convection and heavy rainfall with high-resolution numerical weather prediction models, the outputs are mainly impacted by two sources of errors. One source is the inaccuracies present in the exact representation of the initial and lateral boundary conditions (IC/LBCs). The other source is due to imperfect representation of physical processes via parameterizations. Nowadays, atmospheric ensembles are built to cope with both kinds of distinct uncertainties by perturbing the IC/LBCs or by considering multiple combinations of well-tested numerical schemes. The most appropriate methods for generating Hydrological Ensemble Predictions Systems (HEPS) is a subject under continuous investigation and more methods could come in the future. Here we followed the state-of-the-art approach used in many other hydro-meteorological studies.

Even if PILB and MPS ensembles address different kinds of uncertainties, these sources of error would be expected to have a comparable impact on the skill of quantitative precipitation forecasts (QPFs) if the EPS is properly designed. This seems to be the case of our configuration. Comments on the specific purpose and value of the PILB and MPS ensemble strategies and on the method to avoid under-dispersive behaviour of PILB, have been added in sections 1 and 4.

§ 1:

"However, the most appropriate methods for generating HEPSs and the quantification of their added value are still under assessment (Cloke and Pappenberger, 2009; Cloke et al., 2013). Further efforts devoted to examine the predictive skill of both ensemble strategies and how the external-scale uncertainties spread into the HEPSs become paramount for the optimal design of hydrometeorological operational chains over the flood-prone Western Mediterranean area."

§ 4.1:

"However, perturbed IC/LBCs can produce inadequate spread in the short range, before error growth on the synoptic scale becomes non-linear (Gilmour et al., 2001). Therefore, the implemented PILB ensemble is based on dynamically downscaling these 20 ECMWF-EPS members exhibiting maximum perturbations in the initial and lateral boundaries conditions over the WRF domain."

*The choice of hydrological model also needs further justification given its omission of karstic streamflow contributions which could prove important within the study catchment.*

The hydrological model has been chosen as it represents physical processes using equations derived from classical mechanics while taking into account the spatial variability of both catchment properties and forcing inputs. Karstic areas are not explicitly represented as physically-based models for karstic streamflow contributions are usually site-specific: most of the modelling approaches for karst systems that are not site-specific are conceptual ones

(Bakalowicz, 2005). However the study doesn't focus on the performances of the hydrological model that of course could have been improved. The main purpose is the potential of ensemble strategies to improve flash flood forecasting. That's why NWP model driven runoff simulations have been compared both against the observed discharges and against the observed rain-gauge and radar precipitation driven runoff runs. As already mentioned in the manuscript, the errors due to the parameters and structure of the hydrologic model are therefore not taken into account when comparing NWP model driven runoff simulations against the observed rain-gauge and radar precipitation driven runoff runs. This approach separates the impact of the external-scale uncertainties from these emerging from the hydrological model.

*Further to the above comments, please could the authors also address the following points:*

Done

Done

We followed your suggestion and we have introduced more distinguishable marks and white halo around the text and marks. The reviewed figure also includes the recommendations from Referee #1:

**Figure 1: a) Location of the Agly catchment. The pink star illustrates the position of the meteorological radar while shaded grey areas denote the karstic areas underlying the Agly catchment (from BDLISA v.2: Base de Donnée des Limites des Systèmes Aquifères, <https://bdlisa.eaufrance.fr/> accessed June 18, 2019). b) Digital terrain model of the Agly catchment (Source: IGN; MNT BDALTI). Also included the main tributaries (blue lines, source: IGN, BD CARTHAGE), the radar location (pink star: OPOUL RADAR), the discharge gaging stations (black dots), the dam (white square) and the outlet (white circle).**

The soil moisture at the beginning of the event is of 65% when the second highest initial soil moisture is of 58% for 20141128\_4d. This is significantly different, especially knowing that the outputs of the SIM model used as

initialization for the MARINE model have a limited variation range, mainly between 30% and 70%. A supply of the karstic system can influence only one event, depending on the previous filling conditions of the karst, however it's not the most likely option as hydrogeological studies of the areas conclude that there are losses due to the karstic system in the Verdoube catchment. The amount of snowmelt has not been considered for this part of the catchment as the Corbières are quite low mountains that culminate at approximately 1000 m with usually no snowpack. However it is true that winter 2013 has been very cold and there was a snowfall episode at the very end of February 2013 over the Eastern Pyrenees and Corbières, with snow above 700 to 800 m, which continues during the day on March 1st. This has been modified in the text (§ 3.3):

"There is no definitive explanation for that, but several possibilities can be considered: (i) the very high soil moisture at the beginning of the event (65%, Table 3) which can contribute to the runoff at the outlet via subsurface flows; (ii) an amount of snowmelt as there was a snowfall episode at the very end of February 2013 over the Eastern Pyrenees and Corbières, with snow above 700 to 800 m; (iii) the uncertainties in the discharge and precipitation measurements; (iv) a possible supply from the karstic system (Figure 1) however this possibility is pretty unlikely as hydrological studies conclude to only losses in the Verdoube catchments due to the karstic system (Ladouche et al., 2004)."

Ladouche, B., Dörfliger, N.: Evaluation des ressources en eau des corbières. Phase I – Synthèse de la caractérisation des systèmes karstiques des Corbières Orientales, Technical report BRGM, available online <http://infoterre.brgm.fr/rapports/RP-52919-FR.pdf> accessed December 06, 2019, 2004.

*5. Page 7 Figure 2: I can't read the grey labels for the rain gauge names, could these be enlarged and also maybe with a white halo?*

Done

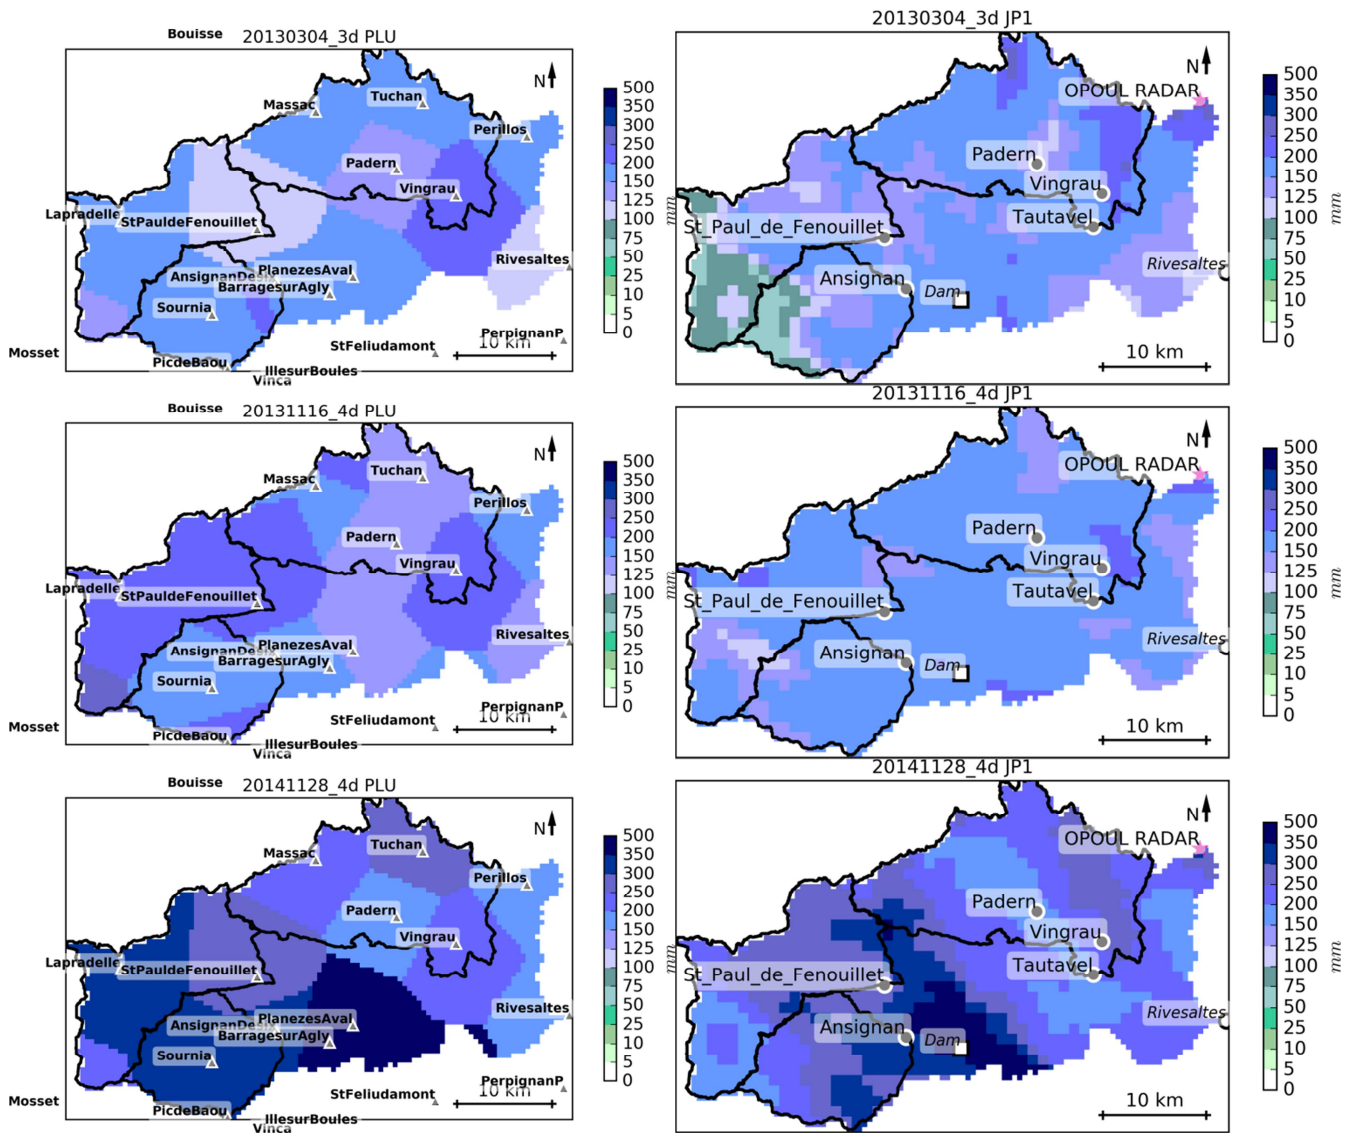

Figure 2: Spatial variability of the cumulative rainfall for event 20130304\_3d (top), 20131116\_4d (middle) and 20141128\_4d (bottom), according to the observations: PLU (left) the operational hourly rain-gauge network (from Hydreel, Serveur de données hydrométriques en temps réel, Bassin Rhône-Méditerranée et Région Auvergne-Rhône-Alpes, <https://www.rdbmrc.com/hydreel2/listestation.php> accessed on November 20, 2019) and JP1 (right) 1 km<sup>2</sup> merging of radar data and rain-gauges measurements.

6. Page 8 Section 3.1: Given the previous discussion about the possible role of contributions from karstic streams, it concerns me that the hydrological model used in this study does not account for this process. Could the authors comment on the significance of karstic streamflow contributions in this catchment and the possible consequences of its exclusion from the hydrological model upon streamflow accuracy?

According to hydrogeological studies of the area, there are only losses in the Agly and Verdoube catchments due to the karstic system. These losses contribute to the streamflow of 2 resurgences draining the Corbières massif but located outside of the Agly catchment (Font-Estramar and Font-Dame resurgences) (Salvayre, 1989). The average loss rates are estimated between 0.3 and 1.5 m<sup>3</sup>/s for the Agly depending on the river discharge and between 0.7-2 m<sup>3</sup>/s on the Verdoube (Ladouche et al., 2004). These are average estimates based on observed discharges and assumptions about the functioning of the karst system and they can be considered small enough not to be explicitly represented during flash flood. These losses can however be implicitly taken into account in the hydrological model by increasing the storage capacity of the catchment during calibration. Moreover, as previously mentioned, the purpose of the study was not the performances of the hydrological model alone but the potential of ensemble strategies to improve flash flood forecasting. That's why NWP model driven runoff simulations have been compared both against the observed discharges and against the observed rain-gauge and radar precipitation driven runoff

runs. The errors due to the parameters and structure of the hydrologic model are therefore not taken into account when comparing NWP model driven runoff simulations against the observed rain-gauge and radar precipitation driven runoff runs. This approach separates the impact of the external-scale uncertainties from these emerging from the hydrological model.

A description of the karstic system contributions has been added in the text (§ 2.1):

"According to hydrogeological studies of the area, there are only losses in the Agly and Verdoube catchments due to the karstic system. These losses contribute to the streamflow of two resurgences draining the Corbières massif but located outside of the Agly catchment (Font-Estramar and Font-Dame resurgences) (Salvayre, 1989). The average loss rates are estimated between 0.3 and 1.5 m<sup>3</sup>/s for the Agly depending on the river discharge and between 0.7-2 m<sup>3</sup>/s on the Verdoube (Ladouche et al., 2004). These are only average estimates based on observed discharges and assumptions about the functioning of the karst system but they can be considered small enough not to be explicitly represented in flash flood simulations."

Ladouche, B., Dörfli, N.: Evaluation des ressources en eau des corbières. Phase I – Synthèse de la caractérisation des systèmes karstiques des Corbières Orientales, Technical report BRGM, available online <http://infoterre.brgm.fr/rapports/RP-52919-FR.pdf> accessed December 06, 2019, 2004.

Salvayre, H.: Les karsts des Pyrénées-Orientales (Caractères hydrogéologiques et spéléologiques généraux). In: Karstologia : revue de karstologie et de spéléologie physique, n°13, 1er semestre 1989. pp. 1-10; doi: <https://doi.org/10.3406/karst.1989.2199>, [https://www.persee.fr/doc/karst\\_0751-7688\\_1989\\_num\\_13\\_1\\_2199](https://www.persee.fr/doc/karst_0751-7688_1989_num_13_1_2199), 1989.

*7. Page 10 Table 4: It seems like the event of 20131116 has a very low efficiency in all but one station which is located at the upper end of the catchment. In their analysis the authors suggest that this is because events with a moderate peak discharge are not well simulated by MARINE. Why is this the case, is it due to the routing scheme in MARINE? From these poor scores I think this event should be eliminated from the rest of the analysis in the manuscript, could the authors comment on this?*

Yes, the events with relatively moderate peak discharge are usually not correctly simulated by MARINE because the flow over the hillslope and in the drainage network is represented with the kinematic wave assumption valid for high flow velocity. However it is difficult to say when this assumption ceases to be valid for overland flow due to local conditions. I do not think it is necessary to withdraw events that do not produce good results because they also have lessons to learn. Here for instance, the ensemble strategies outperform the radar driven discharge simulation for the event of 20131116 which may also be indicative of questionable quantitative precipitation estimates.

*8. Page 12 Line 6: Has 'MPS' being defined previously in the manuscript? If not could the full definition be given?*

MPS stands for mixed-physics ensemble; it is already defined § 1.

*9. Page 13 Line 6: Please give the definition for the IC and LBC acronyms*

IC stands for initial condition and LBC for lateral boundaries conditions, they are defined on § 1.

*10. Page 13 Line 26: How do the different microphysical and PBL schemes add up to 20 ensemble members?*

Each possible combination of the 5 different cloud microphysical schemes with the 4 distinct PBL parameterizations is considered to build a member of the MPS ensemble. These means a total of 20 pairs microphysics-boundary layer. Corresponding sentence in section 4.2 has been rewritten to avoid any confusion:

"The MPS ensemble has been generated using all possible pairs (cloud microphysics-boundary layer) between the following schemes, summing up to 20 members:"

11. Page 14 Line 8: Define the CCN acronym

It is define just before the acronym: cloud condensation nuclei. Capital letters have been added to avoid confusion.

12. Page 14 Line 23: Add the word 'catchment' so the sentence reads '...a single medium-sized catchment is a challenging...'

Done

13. Page 15 Figure 6: Add the following column titles: JP1, MPS, PILB. The same for figures 7 and 8. However I think these figures could all be removed from the manuscript and maybe put in supplementary material in order to cut down the number of figures in the manuscript.

The suggested column titles have been added.

Again, we would prefer to keep these figures in the manuscript as we think they are relevant for a better understanding of the whole study.

14. Page 18 Figure 9: What is the CTRL referring to? In the caption replace 'the best and worst ensemble members' with 'the tails of the ensemble'

CTRL is the acronym of the control (i.e. deterministic simulation). It has been added an explanatory sentence in the caption of Figure 9.

15. Page 20 Line 8: Are the 7735 grid points just within the catchment or is this over a wider area?

The 7735 radar grid-points correspond to the radar domain shown in Figures 6 to 8. A clarifying sentence has been added in the text (§ 5.1):

"As the forecast probabilities are computed and verified against each pixel within the radar domain shown in Figures 6 to 8, the statistical sample sums up to 54145 members (7735 radar grid-points times 7 ensemble experiments)."

16. Page 21 Figure 11: Could a title and units be added to the legends

Done

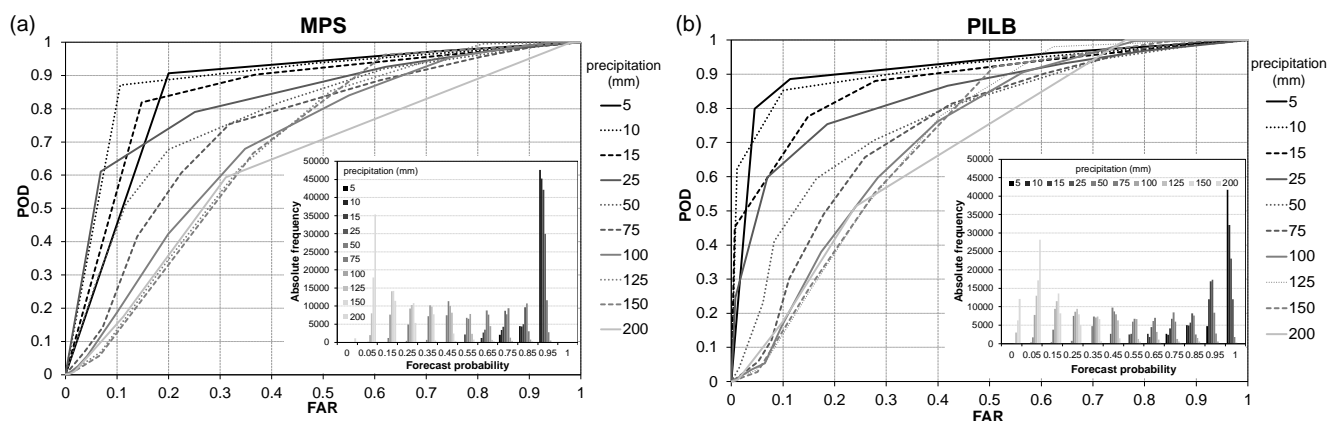

Figure 11: ROC curves of the MPS and PILB ensemble strategies. The embedded figures display the sharpness diagrams containing the number of forecasts used in each probability bin and the total number of observations considered.



17. Page 24 Figure 14, 15, 16: I find it hard to see the grey boxes, could these be made a bit darker and maybe thicker so that they stand out more?

Done

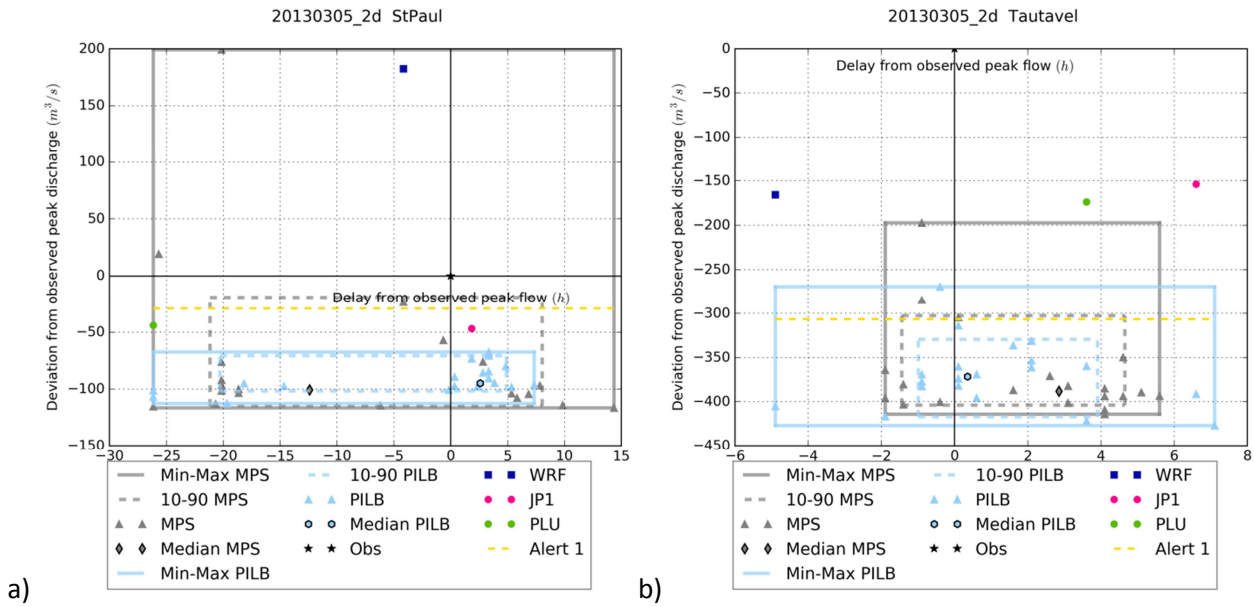

Figure 14: Peak flow analysis at stations n°2 a) and n°5 b) for 20130305\_2d. X-axis shows the delay from the observed peak time, y-axis shows the deviation from the observed peak discharge. The triangles shows the deviation of the simulations with ensemble members forcing (grey for MPS, light blue for PILB), the shapes with black contour shows the deviation of the median of the HEPS simulations with ensemble members forcing, the pink circle shows the deviation of the simulation with JP1 forcing, the green circle the deviation of the simulation with PLU forcing and the dark blue square the deviation of the simulation with deterministic WRF forcing. Alert 1 (yellow dashed line) is the warning threshold, the black star is the observation used as normalized reference.

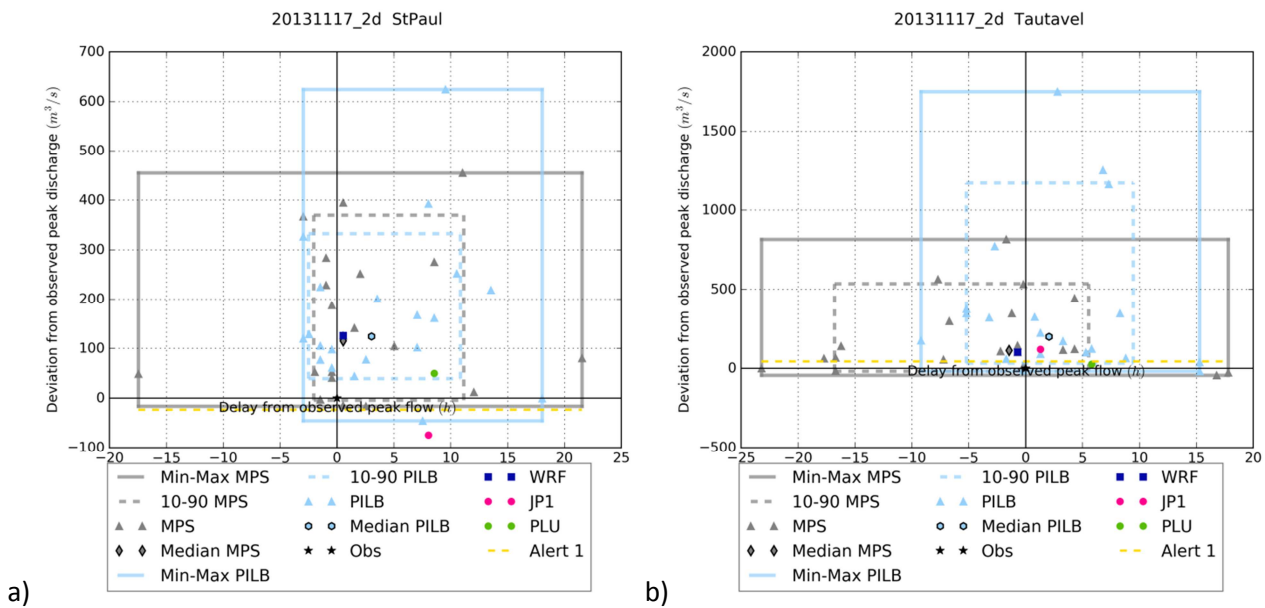

Figure 15: Peak flow analysis at stations n°2 a) and n°5 b) for 20131117\_2d. See Figure for the details of the legend.

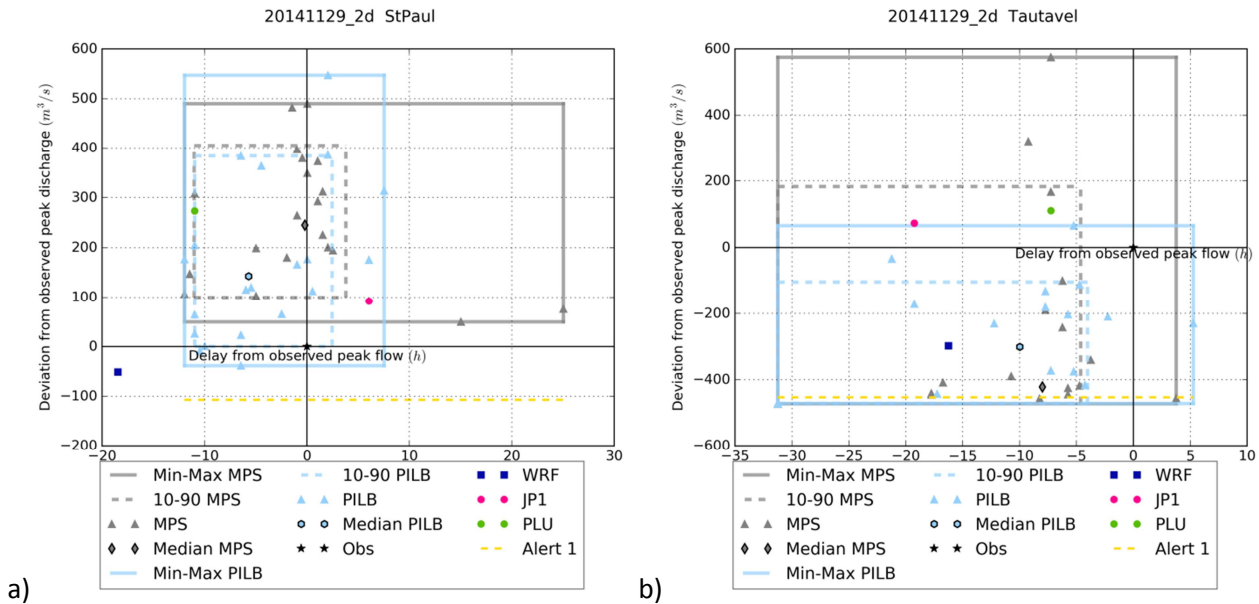

**Figure 16: Peak flow analysis at stations n°2 a) and n°5 b) for 20141129\_2d. See Figure for the details of the legend.**

18. Page 26 Line 18: What is the warning threshold that is used?

The warning threshold that is used is the the first level alert from the flood warning center in France (SCHAPI). It was already mentioned in §5.2 but has been added in §5.3 for clarity.

19. Page 27 Line 6: Replace 'excepted' with 'except'

Done

20. Page 27 Figure 17, 18, 19: I'm unclear what the two separate graphs in each figure show, could the authors improve the titles and/or captions?

Done

**Figure 17: False alarm ratio (FAR) scores at the five gauging stations for the 7 simulations. Statistical indices have been computed by using the observed discharge. Experiments are labelled as WRF: simulated discharge with deterministic WRF forcing, PLU: simulated discharge with PLU forcing, JP1: simulated discharge with JP1 forcing, MPS and PILB: ensemble strategies. The boxplot presents five sample statistics: the minimum, the lower quartile, the median, the upper quartile and the maximum.**

21. Page 28 Line 5: Define QDF if not already defined

Quantitative Discharge Forecast (QDF) was defined in the introduction but the acronym has been deleted for clarity reasons.

22. Page 29 Line 2: Replace 'excepted' with 'except', also occurs on page 30 line 24

Done

23. Page 32 Line 12: Could the authors provide more discussion about why there was little difference between the two ensemble strategies? Why were these two different strategies chosen, what differences may have been expected and why do they think these differences weren't observed?

All these reviewer's concerns have been addressed in the second point of the response letter. We copied the answer below for ease of reading.



When forecasting deep moist convection and heavy rainfall with high-resolution numerical weather prediction models, the outputs are mainly impacted by two sources of errors. One source is the inaccuracies present in the exact representation of the initial and lateral boundary conditions (IC/LBCs). The other source is due to imperfect representation of physical processes via parameterizations. Nowadays, atmospheric ensembles are built to cope with both kinds of distinct uncertainties by perturbing the IC/LBCs or by considering multiple combinations of well-tested numerical schemes. The most appropriate methods for generating Hydrological Ensemble Predictions Systems (HEPS) is a subject under continuous investigation and more methods could come in the future. Here we followed the state-of-the-art approach used in many other hydro-meteorological studies.

Even if PILB and MPS ensembles address different kinds of uncertainties, these sources of error would be expected to have a comparable impact on the skill of quantitative precipitation forecasts (QPFs) if the EPS is properly designed. This seems to be the case of our configuration. Comments on the specific purpose and value of the PILB and MPS ensemble strategies and on the method to avoid under-dispersive behaviour of PILB, have been added in sections 1 and 4.
